# Supplementary material for: Microwave emission from superconducting vortices in Mo/Si superlattices
Source: Nat Commun. 2018 Nov 22;9:4927. doi: 10.1038/s41467-018-07256-0 (PMC6250723; doi:10.1038/s41467-018-07256-0)
Supplement: Supplementary file 3 — Source Data [file 41467_2018_7256_MOESM3_ESM.xls]

## Sheet: Лист1
	Experimental data - mean values							beating fits							expon. damped fits
	harm. number	panel (a)	panel (b)	panel (c)	panel (d)	panel (e)		harm. number	panel (a)	panel (b)	panel (c)	panel (d)	panel (e)		harm. number	panel (a)	panel (b)	panel (e)
	1	1.009		1.005	0.351			1	1.00629	0.00525	0.98876	0.3514	0.00617		1	0.99559	1.4	1.52
	2	0.547	1.002	0.911	0.999	1.001		1.05	0.95011	0.000413598	0.93131	0.32812	0.000481825		1.05	0.96496	1.37686	1.48866
	3	0.265		0.314				1.1	0.85269	0.01243	0.84167	0.30418	0.01436		1.1	0.93527	1.3541	1.45797
	4	0.148	0.351	0.298	0.353	0.509		1.15	0.72451	0.04018	0.72935	0.2823	0.04603		1.15	0.90649	1.33172	1.42791
	5	0.074		0.101				1.2	0.57835	0.08219	0.606	0.2657	0.09339		1.2	0.8786	1.30971	1.39847
	6	0.032	0.153	0.064	0.187	0.247		1.25	0.42794	0.13671	0.48408	0.25769	0.15404		1.25	0.85157	1.28806	1.36963
								1.3	0.28658	0.20173	0.37552	0.26126	0.22542		1.3	0.82537	1.26677	1.3414
								1.35	0.16589	0.27505	0.29058	0.27865	0.30479		1.35	0.79998	1.24583	1.31374
	approx. fit							1.4	0.0748	0.35435	0.23685	0.31106	0.38942		1.4	0.77536	1.22524	1.28665
								1.45	0.01887	0.43726	0.21864	0.3585	0.47653		1.45	0.75151	1.20499	1.26012
	harm. number	panel (a)						1.5	5.60118e-06	0.52136	0.23667	0.4197	0.56348		1.5	0.72839	1.18507	1.23414
	2	0.6						1.55	0.01645	0.60434	0.28818	0.49217	0.64774		1.55	0.70598	1.16549	1.2087
	2.05	0.56206						1.6	0.06325	0.68395	0.36732	0.5724	0.72699		1.6	0.68426	1.14622	1.18378
	2.1	0.52786						1.65	0.13288	0.75813	0.46586	0.65614	0.79914		1.65	0.6632	1.12728	1.15937
	2.15	0.49689						1.7	0.21616	0.825	0.57405	0.7387	0.86242		1.7	0.6428	1.10865	1.13547
	2.2	0.46875						1.75	0.30323	0.88296	0.68161	0.81539	0.91534		1.75	0.62302	1.09032	1.11206
	2.25	0.44308						1.8	0.38455	0.93064	0.7787	0.88183	0.95676		1.8	0.60385	1.0723	1.08913
	2.3	0.41958						1.85	0.45175	0.967	0.85679	0.93429	0.98589		1.85	0.58527	1.05458	1.06667
	2.35	0.39801						1.9	0.49841	0.9913	0.90941	0.96995	1.00229		1.9	0.56727	1.03715	1.04468
	2.4	0.37815						1.95	0.52051	1.00315	0.93255	0.98711	1.00585		1.95	0.54981	1.02	1.02314
	2.45	0.35982						2	0.51664	1.00244	0.92496	0.9852	0.99679		2	0.5329	1.00314	1.00205
	2.5	0.34286						2.05	0.48804	0.9894	0.88806	0.96484	0.97566		2.05	0.5165	0.98656	0.98139
	2.55	0.32712						2.1	0.43823	0.96455	0.82564	0.92765	0.94326		2.1	0.50061	0.97026	0.96115
	2.6	0.3125						2.15	0.37257	0.92869	0.7434	0.87613	0.90066		2.15	0.48521	0.95422	0.94133
	2.65	0.29888						2.2	0.29762	0.88287	0.64829	0.81339	0.84912		2.2	0.47028	0.93845	0.92193
	2.7	0.28617						2.25	0.22041	0.82833	0.54782	0.74285	0.79005		2.25	0.45581	0.92294	0.90292
	2.75	0.27429						2.3	0.14778	0.76652	0.44934	0.66803	0.72503		2.3	0.44179	0.90768	0.8843
	2.8	0.26316						2.35	0.0857	0.699	0.35937	0.59226	0.65567		2.35	0.4282	0.89268	0.86607
	2.85	0.25272						2.4	0.03878	0.62741	0.28313	0.51845	0.58365		2.4	0.41502	0.87792	0.84821
	2.9	0.24291						2.45	0.00988	0.55348	0.22414	0.44896	0.5106		2.45	0.40225	0.86341	0.83073
	2.95	0.23369						2.5	7.10129e-06	0.47891	0.18403	0.38553	0.43814		2.5	0.38988	0.84914	0.8136
	3	0.225						2.55	0.00828	0.40537	0.16258	0.32918	0.36778		2.55	0.37788	0.83511	0.79682
	3.05	0.2168						2.6	0.03215	0.33446	0.1579	0.28033	0.30093		2.6	0.36626	0.8213	0.78039
	3.1	0.20906						2.65	0.06779	0.26765	0.16674	0.23885	0.23882		2.65	0.35499	0.80773	0.7643
	3.15	0.20174						2.7	0.11049	0.20629	0.18495	0.20418	0.18254		2.7	0.34407	0.79438	0.74855
	3.2	0.19481						2.75	0.15518	0.15153	0.20793	0.17552	0.13297		2.75	0.33348	0.78125	0.73311
	3.25	0.18824						2.8	0.19697	0.10434	0.23117	0.15195	0.0908		2.8	0.32322	0.76834	0.718
	3.3	0.182						2.85	0.23156	0.06547	0.25066	0.13259	0.0565		2.85	0.31328	0.75564	0.70319
	3.35	0.17608						2.9	0.25563	0.03544	0.26325	0.11672	0.03033		2.9	0.30364	0.74315	0.6887
	3.4	0.17045						2.95	0.2671	0.01454	0.26694	0.10385	0.01234		2.95	0.29429	0.73086	0.6745
	3.45	0.1651						3	0.26525	0.00284	0.26095	0.0938	0.00239		3	0.28524	0.71878	0.66059
	3.5	0.16						3.05	0.25069	0.000175064	0.24574	0.08663	0.000146132		3.05	0.27646	0.7069	0.64697
	3.55	0.15514						3.1	0.22523	0.00617	0.22287	0.08267	0.00511		3.1	0.26796	0.69522	0.63363
	3.6	0.1505						3.15	0.19159	0.02026	0.19475	0.08241	0.01663		3.15	0.25971	0.68373	0.62057
	3.65	0.14607						3.2	0.15315	0.04168	0.16434	0.08639	0.03393		3.2	0.25172	0.67243	0.60777
	3.7	0.14184						3.25	0.11352	0.06954	0.13483	0.09515	0.05615		3.25	0.24398	0.66131	0.59524
	3.75	0.1378						3.3	0.0762	0.10281	0.10925	0.10905	0.08232		3.3	0.23647	0.65038	0.58297
	3.8	0.13393						3.35	0.04427	0.14037	0.0902	0.12827	0.11146		3.35	0.2292	0.63963	0.57095
	3.85	0.13022						3.4	0.0201	0.18102	0.07957	0.15266	0.14254		3.4	0.22215	0.62906	0.55918
	3.9	0.12667						3.45	0.00517	0.22355	0.07839	0.18174	0.17457		3.45	0.21531	0.61866	0.54765
	3.95	0.12327						3.5	6.77957e-06	0.26671	0.08676	0.21471	0.20655		3.5	0.20869	0.60844	0.53636
	4	0.12						3.55	0.00416	0.30932	0.10385	0.25044	0.23756		3.55	0.20227	0.59838	0.5253
	4.05	0.11686						3.6	0.01634	0.35023	0.12805	0.28757	0.26674		3.6	0.19604	0.58849	0.51447
	4.1	0.11385						3.65	0.03459	0.38837	0.15709	0.32457	0.29333		3.65	0.19001	0.57876	0.50386
	4.15	0.11096						3.7	0.05648	0.42277	0.18835	0.35982	0.31667		3.7	0.18416	0.5692	0.49347
	4.2	0.10817						3.75	0.07942	0.45262	0.21904	0.39176	0.33621		3.75	0.1785	0.55979	0.4833
	4.25	0.10549						3.8	0.10089	0.4772	0.24652	0.41896	0.35153		3.8	0.17301	0.55054	0.47333
	4.3	0.10292						3.85	0.11869	0.49599	0.2685	0.44022	0.36234		3.85	0.16768	0.54144	0.46357
	4.35	0.10043						3.9	0.1311	0.50859	0.28324	0.45465	0.36846		3.9	0.16252	0.53249	0.45402
	4.4	0.09804						3.95	0.13706	0.5148	0.28966	0.4617	0.36986		3.95	0.15752	0.52369	0.44466
	4.45	0.09573						4	0.13618	0.51456	0.28744	0.46121	0.36663		4	0.15268	0.51503	0.43549
	4.5	0.09351						4.05	0.12877	0.508	0.27695	0.45336	0.35894		4.05	0.14798	0.50652	0.42651
	4.55	0.09136						4.1	0.11575	0.49536	0.25922	0.4387	0.34711		4.1	0.14343	0.49815	0.41771
	4.6	0.08929						4.15	0.09852	0.47707	0.23579	0.41803	0.33152		4.15	0.13901	0.48991	0.4091
	4.65	0.08728						4.2	0.07881	0.45365	0.20854	0.39238	0.31263		4.2	0.13474	0.48182	0.40067
	4.7	0.08535						4.25	0.05847	0.42574	0.1795	0.36289	0.29096		4.25	0.13059	0.47385	0.39241
	4.75	0.08348						4.3	0.03929	0.39409	0.15069	0.3308	0.26709		4.3	0.12657	0.46602	0.38432
	4.8	0.08167						4.35	0.02287	0.35948	0.12389	0.29727	0.24162		4.35	0.12268	0.45832	0.37639
	4.85	0.07992						4.4	0.01042	0.32278	0.10057	0.26343	0.21515		4.4	0.11891	0.45074	0.36863
	4.9	0.07823						4.45	0.00271	0.28485	0.08173	0.23024	0.18829		4.45	0.11525	0.44329	0.36103
	4.95	0.07659						4.5	5.58463e-06	0.24657	0.06789	0.19849	0.16164		4.5	0.1117	0.43596	0.35359
	5	0.075						4.55	0.00209	0.20881	0.05906	0.16881	0.13574		4.55	0.10826	0.42876	0.3463
	5.05	0.07346						4.6	0.00831	0.17238	0.05482	0.14163	0.11113		4.6	0.10493	0.42167	0.33916
	5.1	0.07197						4.65	0.01764	0.13804	0.05436	0.11721	0.08826		4.65	0.10171	0.4147	0.33217
	5.15	0.07053						4.7	0.02887	0.10648	0.05665	0.09568	0.06752		4.7	0.09858	0.40785	0.32532
	5.2	0.06912						4.75	0.04064	0.07831	0.06051	0.07706	0.04924		4.75	0.09554	0.40111	0.31861
	5.25	0.06776						4.8	0.05168	0.054	0.06479	0.0613	0.03367		4.8	0.0926	0.39448	0.31204
	5.3	0.06645						4.85	0.06084	0.03396	0.06844	0.04833	0.021		4.85	0.08975	0.38796	0.30561
	5.35	0.06516						4.9	0.06724	0.01845	0.07065	0.03805	0.01132		4.9	0.08699	0.38154	0.29931
	5.4	0.06392						4.95	0.07033	0.00763	0.07088	0.03041	0.00464		4.95	0.08432	0.37524	0.29313
	5.45	0.06271						5	0.06992	0.00153	0.06891	0.02535	0.000924127		5	0.08172	0.36904	0.28709
	5.5	0.06154						5.05	0.06615	7.2585e-05	0.06484	0.02288	4.34139e-05		5.05	0.07921	0.36294	0.28117
	5.55	0.0604						5.1	0.05949	0.00306	0.05906	0.02299	0.00182		5.1	0.07677	0.35694	0.27537
	5.6	0.05929						5.15	0.05066	0.01021	0.05217	0.0257	0.00601		5.15	0.07441	0.35104	0.2697
	5.65	0.05821						5.2	0.04056	0.02113	0.04492	0.03101	0.01233		5.2	0.07212	0.34524	0.26414
	5.7	0.05716						5.25	0.03011	0.03537	0.0381	0.03886	0.02046		5.25	0.0699	0.33953	0.25869
	5.75	0.05614						5.3	0.02026	0.0524	0.03248	0.04917	0.03006		5.3	0.06775	0.33392	0.25336
	5.8	0.05515						5.35	0.01181	0.07163	0.0287	0.06174	0.04076		5.35	0.06567	0.3284	0.24813
	5.85	0.05418						5.4	0.0054	0.09247	0.02721	0.0763	0.05218		5.4	0.06365	0.32297	0.24302
	5.9	0.05324						5.45	0.00142	0.11428	0.02825	0.09249	0.06395		5.45	0.06169	0.31763	0.23801
	5.95	0.05232						5.5	4.20155e-06	0.13644	0.0318	0.10984	0.07571		5.5	0.05979	0.31238	0.2331
	6	0.05143						5.55	0.00105	0.15832	0.03762	0.12781	0.08712		5.55	0.05795	0.30722	0.22829
	6.05	0.05056						5.6	0.00422	0.17934	0.04524	0.14582	0.09787		5.6	0.05617	0.30214	0.22359
	6.1	0.04971						5.65	0.009	0.19895	0.05404	0.16326	0.10767		5.65	0.05444	0.29715	0.21898
	6.15	0.04888						5.7	0.01475	0.21665	0.0633	0.17949	0.11628		5.7	0.05276	0.29224	0.21446
	6.2	0.04808						5.75	0.0208	0.23202	0.07225	0.19395	0.12349		5.75	0.05114	0.28741	0.21004
	6.25	0.04729						5.8	0.02647	0.24469	0.08019	0.20611	0.12916		5.8	0.04957	0.28266	0.20571
	6.3	0.04652						5.85	0.03118	0.2544	0.08649	0.21555	0.13316		5.85	0.04804	0.27798	0.20147
	6.35	0.04578						5.9	0.03449	0.26093	0.09069	0.22195	0.13545		5.9	0.04656	0.27339	0.19731
	6.4	0.04505						5.95	0.03609	0.26419	0.09249	0.22512	0.136		5.95	0.04513	0.26887	0.19325
	6.45	0.04433						6	0.0359	0.26413	0.09181	0.22501	0.13485		6	0.04374	0.26443	0.18926
	6.5	0.04364						6.05	0.03398	0.26083	0.08876	0.22169	0.13205		6.05	0.0424	0.26006	0.18536
	6.55	0.04296						6.1	0.03057	0.2544	0.08361	0.21534	0.12773		6.1	0.04109	0.25576	0.18154
	6.6	0.04229						6.15	0.02605	0.24507	0.07678	0.20627	0.12203		6.15	0.03983	0.25153	0.1778
	6.65	0.04164						6.2	0.02087	0.2331	0.06879	0.19485	0.1151		6.2	0.0386	0.24737	0.17413
	6.7	0.04101						6.25	0.01551	0.21882	0.0602	0.1815	0.10716		6.25	0.03742	0.24328	0.17054
	6.75	0.04039						6.3	0.01045	0.20261	0.05156	0.1667	0.09839		6.3	0.03626	0.23926	0.16702
	6.8	0.03979						6.35	0.0061	0.18487	0.04338	0.15093	0.08903		6.35	0.03515	0.23531	0.16358
	6.85	0.0392						6.4	0.0028	0.16605	0.03605	0.13464	0.07931		6.4	0.03407	0.23142	0.16021
	6.9	0.03862						6.45	0.000741378	0.14659	0.02989	0.11826	0.06943		6.45	0.03302	0.22759	0.1569
	6.95	0.03805						6.5	2.97267e-06	0.12695	0.02505	0.1022	0.05963		6.5	0.032	0.22383	0.15367
	7	0.0375						6.55	0.000528357	0.10756	0.02156	0.08677	0.0501		6.55	0.03102	0.22013	0.1505
	7.05	0.03696						6.6	0.00215	0.08884	0.01934	0.07226	0.04104		6.6	0.03006	0.21649	0.1474
	7.1	0.03643						6.65	0.00459	0.07119	0.0182	0.05889	0.03261		6.65	0.02914	0.21292	0.14436
	7.15	0.03591						6.7	0.00754	0.05496	0.01788	0.04685	0.02497		6.7	0.02824	0.2094	0.14138
	7.2	0.03541						6.75	0.01064	0.04046	0.01809	0.03625	0.01823		6.75	0.02737	0.20594	0.13847
	7.25	0.03491						6.8	0.01356	0.02795	0.01853	0.02718	0.01249		6.8	0.02653	0.20253	0.13561
	7.3	0.03442						6.85	0.01598	0.01762	0.01894	0.0197	0.00781		6.85	0.02572	0.19918	0.13282
	7.35	0.03395						6.9	0.01769	0.00961	0.01911	0.01384	0.00422		6.9	0.02492	0.19589	0.13008
	7.4	0.03348						6.95	0.01852	0.00401	0.01888	0.00961	0.00175		6.95	0.02416	0.19265	0.1274
	7.45	0.03303						7	0.01843	0.000826033	0.01821	0.00702	0.000356971		7	0.02341	0.18947	0.12477
	7.5	0.03258						7.05	0.01745	2.93342e-05	0.01711	0.00604	1.25716e-05		7.05	0.02269	0.18634	0.1222
								7.1	0.01571	0.00152	0.01567	0.00664	0.000645609		7.1	0.022	0.18326	0.11968
								7.15	0.0134	0.00515	0.01404	0.00876	0.00217		7.15	0.02132	0.18023	0.11721
								7.2	0.01074	0.01072	0.01241	0.01233	0.00448		7.2	0.02066	0.17725	0.11479
								7.25	0.00799	0.01799	0.01096	0.01724	0.00746		7.25	0.02003	0.17432	0.11243
								7.3	0.00539	0.0267	0.00989	0.02335	0.01098		7.3	0.01941	0.17144	0.11011
								7.35	0.00315	0.03656	0.00935	0.03052	0.0149		7.35	0.01881	0.16861	0.10784
								7.4	0.00145	0.04724	0.00944	0.03853	0.0191		7.4	0.01823	0.16582	0.10561
								7.45	0.000387828	0.05843	0.01022	0.04717	0.02342		7.45	0.01767	0.16308	0.10344
								7.5	2.01191e-06	0.0698	0.01166	0.05619	0.02775		7.5	0.01713	0.16038	0.1013
